# Supplementary material
Source: PubMed Central journal article supplement (PMC5220649)
Supplement: CJN.02520316SupplementaryData.pdf [file CJN.02520316SupplementaryData.pdf]

## **Supplemental Material**

**Supplemental Table 1.** Baseline characteristics of included and excluded patients

**Supplemental Table 2.** Baseline characteristics of patients with and without AKI

**Supplemental Table 3.** Trend in serum creatinine among patients with AKI

**Supplemental Table 1. Baseline characteristics of included and excluded patients**

|                                          | Total<br>N=274  | Included<br>n=218 | Excluded<br>n=56 | <i>p</i> -value |
|------------------------------------------|-----------------|-------------------|------------------|-----------------|
| <b>Patient characteristics</b>           |                 |                   |                  |                 |
| Men, <i>n</i> (%)                        | 200 (73.0)      | 159 (72.9)        | 41 (73.2)        | 0.97            |
| Age (years)                              | 67.4 ± 11.5     | 68.1 ± 11.3       | 64.8 ± 12.1      | 0.07            |
| Caucasian, <i>n</i> (%)                  | 260 (94.9)      | 207 (95.0)        | 53 (94.6)        | 0.92            |
| Diabetes, <i>n</i> (%)                   | 94 (34.3)       | 69 (31.7)         | 25 (44.6)        | 0.07            |
| Hypertension, <i>n</i> (%)               | 238 (86.9)      | 190 (87.2)        | 48 (85.7)        | 0.78            |
| Heart Failure, <i>n</i> (%)              | 97 (35.4)       | 75 (34.4)         | 22 (39.3)        | 0.50            |
| PVD, <i>n</i> (%)                        | 47 (17.2)       | 40 (18.4)         | 7 (12.5)         | 0.30            |
| COPD, <i>n</i> (%)                       | 86 (31.4)       | 69 (31.7)         | 17 (30.4)        | 0.85            |
| eGFR (ml/min/1.73m <sup>2</sup> )        | 73.1 ± 19.6     | 71.9 ± 19.3       | 77.9 ± 20.1      | 0.05            |
| Serum creatinine (mg/dL)                 | 1.0 ± 0.3       | 1.1 ± 0.3         | 1.0 ± 0.2        | 0.09            |
| LVEF %                                   | 51.2 ± 14.3     | 51.1 ± 14.5       | 51.4 ± 13.8      | 0.88            |
| Preoperative radiocontrast, <i>n</i> (%) | 197 (71.9)      | 150 (68.8)        | 47 (83.9)        | 0.02            |
| Sample storage time (years)*             | 7.8 ± 2.5       | 8.4 ± 2.1         | 5.2 ± 1.8        | <0.01           |
| Uromodulin (µg/mL)                       | 9.5 (5.7, 15.9) | 9.1 (5.3, 15.5)   | 11.2 (8, 16.5)   | 0.20            |
| <b>Surgery characteristics</b>           |                 |                   |                  |                 |
| Valve only, <i>n</i> (%)                 | 123 (44.9)      | 99 (45.4)         | 24 (42.9)        | 0.73            |
| CPB time (minutes)                       | 118.6 ± 51.5    | 115.8 ± 47.5      | 129.8 ± 64.0     | 0.13            |
| Non-elective surgery, <i>n</i> (%)       | 179 (65.3)      | 142 (65.1)        | 37 (66.1)        | 0.90            |
| <b>Outcomes</b>                          |                 |                   |                  |                 |
| AKI, <i>n</i> (%)                        | 78 (28.5)       | 64 (29.4)         | 14 (25.0)        | 0.52            |
| Severe AKI, <i>n</i> (%)                 | 10 (3.7)        | 8 (3.7)           | 2 (3.6)          | 0.97            |
| Peak postoperative serum creatinine      | 1.3 ± 0.5       | 1.3 ± 0.5         | 1.2 ± 0.4        | 0.34            |

All values expressed as *n* (%), mean ± SD or median (25<sup>th</sup>, 75<sup>th</sup> percentiles).

\* Storage time for excluded patients is time from date of surgery to 9/3/2015 when uromodulin was assayed

Abbreviations: PVD- peripheral vascular disease, COPD- chronic obstructive pulmonary disease, eGFR- estimated glomerular filtration rate, LVEF- left ventricular ejection fraction, creatinine, CPB- cardiopulmonary bypass, AKI- acute kidney injury

**Supplemental Table 2. Baseline characteristics of patients with and without AKI**

|                                     | Total<br>N=274   | No AKI<br>n=154  | AKI<br>N=64      | <i>p</i> -value |
|-------------------------------------|------------------|------------------|------------------|-----------------|
| <b>Patient characteristics</b>      |                  |                  |                  |                 |
| Men, <i>n</i> (%)                   | 159 (72.9)       | 113 (73.4)       | 46 (71.9)        | 0.82            |
| Age (years)                         | 68.1 ± 11.3      | 66.5 ± 11.8      | 71.98 ± 8.8      | <0.01           |
| Caucasian, <i>n</i> (%)             | 207 (95.0)       | 143 (92.9)       | 64 (100.0)       | 0.03            |
| Diabetes, <i>n</i> (%)              | 69 (31.7)        | 48 (31.2)        | 21 (32.8)        | 0.81            |
| Hypertension, <i>n</i> (%)          | 190 (87.2)       | 130 (84.4)       | 60 (93.8)        | 0.06            |
| Heart Failure, <i>n</i> (%)         | 75 (34.4)        | 41 (26.6)        | 34 (53.1)        | <0.01           |
| PVD, <i>n</i> (%)                   | 40 (18.4)        | 23 (14.9)        | 17 (26.6)        | 0.04            |
| COPD, <i>n</i> (%)                  | 69 (31.7)        | 46 (29.9)        | 23 (35.9)        | 0.38            |
| eGFR (ml/min/1.73m <sup>2</sup> )   | 71.9 ± 19.3      | 75.5 ± 18.3      | 62.6 ± 18.6      | <0.01           |
| Serum creatinine (mg/dL)            | 1.1 ± 0.3        | 1.0 ± 0.3        | 1.2 ± 0.4        | <0.01           |
| ACR (mg/g)*                         | 16.6 (6.7, 46.5) | 15.2 (5.7, 47.4) | 20.4 (9.2, 28.3) | 0.17            |
| LVEF %                              | 51.1 ± 14.5      | 51.3 ± 14.6      | 50.7 ± 14.3      | 0.78            |
| Preoperative contrast, <i>n</i> (%) | 150 (68.8)       | 107 (69.5)       | 43 (67.2)        | 0.74            |
| Sample storage time (years)         | 8.4 ± 2.1        | 8.3 ± 2.2        | 8.7 ± 2.1        | 0.28            |
| Uromodulin/Cr (µg/g)*               | 10 (4.2, 22.8)   | 11.1 (5.1, 25.3) | 7.7 (3.8, 18.4)  | <0.01           |
| <b>Surgery characteristics</b>      |                  |                  |                  |                 |
| Valve only, <i>n</i> (%)            | 99 (45.4)        | 59 (38.3)        | 40 (62.5)        | <0.01           |
| CPB time (minutes)                  | 115.8 ± 47.5     | 110.7 ± 45.3     | 128.0 ± 50.9     | 0.02            |
| Non-elective surgery, <i>n</i> (%)  | 142 (65.1)       | 103 (66.9)       | 39 (60.9)        | 0.40            |

All values expressed as *n* (%), mean ± SD or \*median (25<sup>th</sup>, 75<sup>th</sup> percentiles)

Abbreviations: CAD-coronary artery disease, CKD- chronic kidney disease, eGFR- estimated glomerular filtration rate, Uromodulin/Cr- uromodulin-to-creatinine ratio, ACR-albumin to creatinine ratio, LVEF- left ventricular ejection fraction, CPB- cardiopulmonary bypass

**Supplemental Table 3. Trend in serum creatinine among patients with AKI**

| <b>Serum Creatinine</b> | Quartile 1  | Quartile 2  | Quartile 3  | Quartile 4  | <i>Trend<br/>p-value</i> |
|-------------------------|-------------|-------------|-------------|-------------|--------------------------|
| Preoperative (0-hour)   | 1.18 ± 0.32 | 1.27 ± 0.54 | 1.17 ± 0.25 | 0.98 ± 0.12 | 0.26                     |
| Postoperative 24-hour   | 1.46 ± 0.33 | 1.59 ± 0.61 | 1.39 ± 0.30 | 1.21 ± 0.23 | 0.11                     |
| Postoperative 48-hour   | 1.67 ± 0.50 | 1.98 ± 0.72 | 1.64 ± 0.48 | 1.30 ± 0.16 | 0.13                     |
| Postoperative 72-hour   | 1.57 ± 0.55 | 2.00 ± 0.86 | 1.70 ± 0.64 | 1.26 ± 0.33 | 0.32                     |
